# Supplementary material
Source: MDPI journal article supplement (https://www.mdpi.com/2073-4395/14/2/302)
Supplement: s1 [file s1]

**Table S1.** Characteristics of the U.S. modern peach breeding germplasm used in this study, including fruitlet freeze tolerance and classification in freeze tolerance groups based on IP (inflection point, °C) and AUC (area under the curve, %). Fruit type – FT; origin – country (state); CR - chilling requirement in chill hours (CH); HR - heat requirement in growing degree hours (GDH); BD - bloom date (BLUP) in Julian Days (JD). Accessions are ordered based on the year of release. Peach – P and nectarine – N. FlavrBurst™ (KV00398); Messina® (NJ352); SummerFest™ (KV981175).

| Accession  | FT | Origin   | Released | CR   | HR    | BD   | Fruitlet Freeze |      |      |      |         |      | Grouping |     |      |     |
|------------|----|----------|----------|------|-------|------|-----------------|------|------|------|---------|------|----------|-----|------|-----|
|            |    |          |          | (CH) | (GDH) | (JD) | 2022            |      | 2023 |      | Average |      | 2022     |     | 2023 |     |
|            |    |          |          |      |       |      | IP              | AUC  | IP   | AUC  | IP      | AUC  | IP       | AUC | IP   | AUC |
| Elberta    | P  | USA (GA) | 1889     | 800  | 5112  | 75   | -5.3            | 32.6 | -5.9 | 35.4 | -5.6    | 34.0 | 2        | 2   | 2    | 3   |
| Redrose    | P  | USA (NJ) | 1940     | 850  | 1654  | 75   | -6.4            | 26.4 | -5.7 | 33.6 | -6.1    | 30.0 | 1        | 2   | 2    | 2   |
| Loring     | P  | USA (MO) | 1946     | 800  | 3667  | 73   | -5.1            | 42.4 | -5.4 | 27.3 | -5.3    | 34.9 | 2        | 3   | 2    | 2   |
| Coronet    | P  | USA (GA) | 1953     | 588  | 5934  | 69   | -6.0            | 38.7 | -5.8 | 39.1 | -5.9    | 38.9 | 2        | 3   | 2    | 3   |
| Redglobe   | P  | USA (MD) | 1954     | 850  | 1654  | 75   | -6.0            | 24.7 | -5.4 | 17.7 | -5.7    | 21.2 | 2        | 1   | 2    | 1   |
| June Gold  | P  | USA (CA) | 1959     | 650  | 4879  | 68   | -4.0            | 45.7 | -5.5 | 33.3 | -4.8    | 39.5 | 3        | 3   | 2    | 2   |
| Parade     | P  | USA (CA) | 1960     | 800  | 3762  | 72   | -7.6            | 22.5 | -5.3 | 18.5 | -6.5    | 20.5 | 1        | 1   | 2    | 1   |
| Jefferson  | P  | USA (VA) | 1960     | 850  | 3578  | 77   | -4.2            | 34.5 | -5.3 | 28.7 | -4.8    | 31.6 | 3        | 2   | 2    | 2   |
| Cresthaven | P  | USA (MI) | 1963     | 950  | 5506  | 74   | -4.6            | 35.7 | -5.5 | 27.1 | -5.1    | 31.4 | 3        | 3   | 2    | 2   |
| Empress    | P  | USA (CA) | 1964     | 650  | 5400  | 69   | -5.8            | 31.6 | -5.4 | 32.4 | -5.6    | 32.0 | 2        | 2   | 2    | 2   |
| Big Red    | P  | USA (FL) | 1969     | 750  | 5193  | 72   | -5.3            | 29.9 | -5.0 | 25.4 | -5.2    | 27.6 | 2        | 2   | 2    | 2   |
| O’Henry    | P  | USA (CA) | 1970     | 800  | 4876  | 74   | -5.5            | 28.0 | -5.3 | 28.9 | -5.4    | 28.5 | 2        | 2   | 2    | 2   |
| Brightstar | P  | USA (CA) | 1976     | 708  | 6242  | 74   | -7.6            | 24.0 | -7.5 | 23.5 | -7.6    | 23.7 | 1        | 1   | 1    | 1   |
| Topaz      | P  | USA (MO) | 1976     | 700  | -     | -    | -6.0            | 23.3 | -5.6 | 24.8 | -5.8    | 24.0 | 1        | 1   | 2    | 1   |
| Biscoe     | P  | USA (NC) | 1977     | 900  | 5380  | 73   | -5.7            | 34.4 | -5.9 | 29.0 | -5.8    | 31.7 | 2        | 2   | 2    | 2   |
| Majestic   | P  | USA (LA) | 1979     | 750  | 5869  | 73   | -4.7            | 37.1 | -5.5 | 35.2 | -5.1    | 36.1 | 3        | 3   | 2    | 3   |
| Sunprince  | P  | USA (GA) | 1982     | 800  | 3402  | 71   | -7.8            | 22.0 | -6.0 | 22.0 | -6.9    | 22.0 | 1        | 1   | 2    | 1   |
| Ruston Red | P  | USA (LA) | 1982     | 800  | -     | -    | -4.9            | 33.1 | -4.6 | 32.7 | -4.8    | 32.9 | 2        | 2   | 3    | 2   |
| Goldcrest  | P  | USA (CA) | 1984     | 650  | 4598  | 66   | -5.8            | 35.8 | -4.7 | 36.6 | -5.2    | 36.2 | 2        | 3   | 3    | 3   |
| Juneprince | P  | USA (GA) | 1985     | 650  | 4598  | 67   | -5.6            | 32.6 | -6.2 | 29.9 | -5.9    | 31.2 | 2        | 2   | 1    | 2   |

| Accession       | FT | Origin   | Released | CR   | HR    | BD   | Fruitlet Freeze |      |      |      |         |      | Grouping |     |      |     |
|-----------------|----|----------|----------|------|-------|------|-----------------|------|------|------|---------|------|----------|-----|------|-----|
|                 |    |          |          | (CH) | (GDH) | (JD) | 2022            |      | 2023 |      | Average |      | 2022     |     | 2023 |     |
|                 |    |          |          |      |       |      | IP              | AUC  | IP   | AUC  | IP      | AUC  | IP       | AUC | IP   | AUC |
| Fireprince      | P  | USA (GA) | 1985     | 850  | 5796  | 73   | -4.1            | 34.3 | -5.8 | 28.7 | -4.9    | 31.5 | 3        | 2   | 2    | 2   |
| Caroking        | P  | USA (SC) | 1987     | 636  | 5824  | 71   | -4.5            | 40.1 | -4.0 | 44.2 | -4.3    | 42.1 | 3        | 3   | 3    | 3   |
| Tra-Zee         | P  | USA (CA) | 1988     | 800  | 5915  | 80   | -5.3            | 28.5 | -5.4 | 29.1 | -5.3    | 28.8 | 2        | 2   | 2    | 2   |
| Carogem         | P  | USA (SC) | 1989     | 850  | 2178  | 75   | -6.4            | 28.2 | -5.9 | 25.3 | -6.1    | 26.7 | 1        | 2   | 2    | 2   |
| Scarlet Pearl   | P  | USA (GA) | 1989     | 750  | 5531  | 72   | -4.7            | 38.6 | -6.0 | 35.1 | -5.3    | 36.8 | 3        | 3   | 2    | 3   |
| Rich May        | P  | USA (CA) | 1991     | 800  | 3402  | 70   | -5.4            | 35.3 | -    | -    | -5.4    | 35.3 | 2        | 3   | -    | -   |
| Summerprince    | P  | USA (GA) | 1992     | 850  | 5242  | 71   | -6.8            | 22.6 | -7.2 | 24.8 | -7.0    | 23.7 | 1        | 1   | 1    | 1   |
| Glory           | P  | USA (GA) | 1992     | 800  | 5280  | 74   | -6.3            | 21.9 | -5.4 | 15.8 | -5.8    | 18.8 | 1        | 1   | 2    | 1   |
| Rich Joy        | P  | USA (CA) | 1992     | 850  | -     | -    | -4.3            | 44.1 | -4.4 | 39.1 | -4.3    | 41.6 | 3        | 3   | 3    | 3   |
| Flameprince     | P  | USA (GA) | 1993     | 850  | 5661  | 72   | -5.1            | 32.1 | -6.2 | 29.6 | -5.7    | 30.9 | 2        | 2   | 1    | 2   |
| Guardian®       | P  | USA (SC) | 1993     | 850  | -     | -    | -5.0            | 26.0 | -5.8 | 25.6 | -5.4    | 25.8 | 3        | 2   | 2    | 2   |
| P.F. 23         | P  | USA (MI) | 1993     | 700  | 5287  | 69   | -4.8            | 32.0 | -5.8 | 34.8 | -5.3    | 33.4 | 3        | 2   | 2    | 2   |
| Autumn Red      | P  | USA (CA) | 1996     | 800  | 5284  | 78   | -4.5            | 32.0 | -5.4 | 33.4 | -5.0    | 32.7 | 3        | 2   | 2    | 2   |
| Sweet September | P  | USA (CA) | 1997     | 850  | 2350  | 80   | -8.3            | 25.4 | -6.0 | 25.4 | -7.1    | 25.4 | 1        | 2   | 2    | 2   |
| Autumnprince    | P  | USA (GA) | 1997     | 800  | 3901  | 73   | -7.3            | 26.7 | -6.3 | 26.0 | -6.8    | 26.4 | 1        | 2   | 1    | 2   |
| Snow Prince     | P  | USA (CA) | 1997     | -    | -     | -    | -6.2            | 23.9 | -6.6 | 20.0 | -6.4    | 22.0 | 1        | 1   | 1    | 1   |
| Rubyprince      | P  | USA (GA) | 1997     | 850  | -     | -    | -5.4            | 31.9 | -7.8 | 27.1 | -6.6    | 29.5 | 2        | 2   | 1    | 2   |
| Sureprince      | P  | USA (GA) | 1998     | 950  | 5260  | 73   | -5.9            | 36.9 | -6.2 | 37.5 | -6.1    | 37.2 | 2        | 3   | 1    | 3   |
| Valley Sweet    | P  | USA (CA) | 1998     | 700  | 4485  | 64   | -5.5            | 32.2 | -6.0 | 29.2 | -5.7    | 30.7 | 2        | 2   | 2    | 2   |
| Joanna Sweet    | P  | USA (CA) | 1999     | 800  | 5112  | 75   | -5.0            | 31.9 | -5.6 | 34.7 | -5.3    | 33.3 | 3        | 2   | 2    | 2   |
| John Boy        | P  | USA (PA) | 2000     | 800  | 4365  | 74   | -5.4            | 31.8 | -6.4 | 28.2 | -5.9    | 30.0 | 2        | 2   | 1    | 2   |
| China Pearl     | P  | USA (NC) | 2001     | 1100 | -     | -    | -4.7            | 36.5 | -3.9 | 35.7 | -4.3    | 36.1 | 3        | 3   | 3    | 3   |
| White River     | P  | USA (AR) | 2002     | 700  | -     | -    | -5.3            | 34.3 | -5.7 | 29.9 | -5.5    | 32.1 | 2        | 2   | 2    | 2   |
| Julyprince      | P  | USA (GA) | 2004     | 850  | 1654  | 75   | -4.1            | 47.8 | -4.9 | 40.4 | -4.5    | 44.1 | 3        | 3   | 3    | 3   |
| Carored         | P  | USA (SC) | 2005     | 612  | 6197  | 69   | -5.5            | 35.5 | -    | -    | -5.5    | 35.5 | 2        | 3   | -    | -   |

| Accession          | FT | Origin   | Released | CR   | HR    | BD   | Fruitlet Freeze |      |      |      |         |      | Grouping |     |      |     |
|--------------------|----|----------|----------|------|-------|------|-----------------|------|------|------|---------|------|----------|-----|------|-----|
|                    |    |          |          | (CH) | (GDH) | (JD) | 2022            |      | 2023 |      | Average |      | 2022     |     | 2023 |     |
|                    |    |          |          |      |       |      | IP              | AUC  | IP   | AUC  | IP      | AUC  | IP       | AUC | IP   | AUC |
| Augustprince       | P  | USA (GA) | 2006     | 850  | 1547  | 75   | -6.3            | 25.2 | -5.4 | 32.2 | -5.8    | 28.7 | 1        | 2   | 2    | 2   |
| Early Augustprince | P  | USA (GA) | 2006     | 800  | 5112  | 74   | -6.0            | 23.4 | -6.6 | 16.1 | -6.3    | 19.8 | 2        | 1   | 1    | 1   |
| Messina®           | P  | USA (NJ) | 2006     | -    | -     | -    | -6.0            | 33.6 | -    | -    | -6.0    | 33.6 | 2        | 2   | -    | -   |
| FlavrBurst™        | P  | USA (WV) | 2008     | -    | -     | -    | -4.9            | 33.3 | -    | -    | -4.9    | 33.3 | 3        | 2   | -    | -   |
| SummerFest™        | P  | USA (WV) | 2010     | -    | -     | -    | -5.6            | 23.3 | -6.2 | 23.9 | -5.9    | 23.6 | 2        | 1   | 1    | 1   |
| Sweetstar          | P  | France   | 2010     | -    | -     | -    | -4.8            | 30.8 | -7.1 | 26.3 | -5.9    | 28.5 | 3        | 2   | 1    | 2   |
| SC-01              | P  | USA (SC) | -        | 800  | 2706  | 66   | -4.8            | 37.3 | -5.1 | 38.0 | -4.9    | 37.6 | 3        | 3   | 2    | 3   |
| SC-02              | P  | USA (SC) | -        | 564  | 5947  | 62   | -5.6            | 32.7 | -5.3 | 30.0 | -5.5    | 31.4 | 2        | 2   | 2    | 2   |
| SC-03              | P  | USA (SC) | -        | 972  | 3877  | 77   | -5.4            | 29.0 | -5.3 | 27.8 | -5.4    | 28.4 | 2        | 2   | 2    | 2   |
| SC-04              | P  | USA (SC) | -        | 996  | 3052  | 76   | -4.6            | 31.2 | -5.6 | 33.7 | -5.1    | 32.4 | 3        | 2   | 2    | 2   |
| SC-05              | P  | USA (SC) | -        | 1068 | 4147  | 78   | -5.2            | 32.5 | -4.7 | 34.7 | -5.0    | 33.6 | 2        | 2   | 3    | 2   |
| SC-06              | P  | USA (SC) | -        | 1116 | 4856  | 72   | -6.0            | 34.9 | -5.3 | 27.4 | -5.6    | 31.1 | 2        | 2   | 2    | 2   |
| SC-07              | P  | USA (SC) | -        | 972  | 1362  | 70   | -5.6            | 23.3 | -7.2 | 24.5 | -6.4    | 23.9 | 2        | 1   | 1    | 1   |
| SC-08              | P  | USA (SC) | -        | 800  | 5095  | 69   | -5.4            | 24.3 | -6.9 | 27.7 | -6.1    | 26.0 | 2        | 1   | 1    | 2   |
| SC-09              | P  | USA (SC) | -        | 708  | 5473  | 71   | -4.9            | 35.5 | -5.7 | 35.6 | -5.3    | 35.5 | 3        | 3   | 2    | 3   |
| SC-10              | P  | USA (SC) | -        | 516  | 5997  | 62   | -5.7            | 26.8 | -6.0 | 26.3 | -5.9    | 26.6 | 2        | 2   | 2    | 2   |
| SC-11              | P  | USA (SC) | -        | 1068 | 3779  | 73   | -5.9            | 30.0 | -5.6 | 31.7 | -5.8    | 30.9 | 2        | 2   | 2    | 2   |
| SC-12              | P  | USA (SC) | -        | 540  | 7039  | 67   | -6.4            | 27.1 | -6.1 | 25.9 | -6.2    | 26.5 | 1        | 2   | 1    | 2   |
| SC-13              | P  | USA (SC) | -        | 516  | 6863  | 65   | -5.7            | 28.3 | -6.6 | 28.2 | -6.1    | 28.3 | 2        | 2   | 1    | 2   |
| SC-14              | P  | USA (SC) | -        | -    | -     | -    | -5.4            | 30.2 | -5.3 | 29.8 | -5.4    | 30.0 | 2        | 2   | 2    | 2   |
| SC-15              | P  | USA (SC) | -        | -    | -     | -    | -5.3            | 31.5 | -5.8 | 28.2 | -5.5    | 29.8 | 2        | 2   | 2    | 2   |
| Silver Gem         | N  | USA (CA) | 1982     | -    | -     | -    | -6.6            | 20.9 | -6.8 | 22.1 | -6.7    | 21.5 | 1        | 1   | 1    | 1   |
| Summer Fire        | N  | USA (CA) | 1990     | -    | -     | -    | -8.6            | 20.9 | -6.2 | 23.6 | -7.4    | 22.3 | 1        | 1   | 1    | 1   |
| Arctic Pride       | N  | USA (CA) | 1993     | 800  | 2846  | 69   | -10.2           | 19.4 | -6.0 | 23.8 | -8.1    | 21.6 | 1        | 1   | 1    | 1   |
| Arctic Gold        | N  | USA (CA) | 1995     | -    | -     | -    | -6.0            | 23.1 | -5.7 | 22.4 | -5.8    | 22.8 | 2        | 1   | 2    | 1   |

| Accession    | FT | Origin   | Released | CR   | HR    | BD   | Fruitlet Freeze |      |      |      |         |      | Grouping |     |      |     |
|--------------|----|----------|----------|------|-------|------|-----------------|------|------|------|---------|------|----------|-----|------|-----|
|              |    |          |          | (CH) | (GDH) | (JD) | 2022            |      | 2023 |      | Average |      | 2022     |     | 2023 |     |
|              |    |          |          |      |       |      | IP              | AUC  | IP   | AUC  | IP      | AUC  | IP       | AUC | IP   | AUC |
| Juneprincess | N  | USA (GA) | 1997     | 850  | 6117  | 73   | -4.0            | 18.7 | -4.1 | 24.5 | -4.1    | 21.6 | 3        | 1   | 3    | 1   |
| Arctic Belle | N  | USA (CA) | 1998     | 900  | 6076  | 75   | -6.9            | 21.0 | -7.0 | 23.9 | -6.9    | 22.5 | 1        | 1   | 1    | 1   |
| Arctic Blaze | N  | USA (CA) | 1998     | 750  | 4476  | 69   | -6.9            | 19.8 | -5.4 | 23.1 | -6.1    | 21.5 | 1        | 1   | 2    | 1   |
| Arrington    | N  | USA (AR) | 2002     | 750  | 5193  | 72   | -6.5            | 22.5 | -5.0 | 32.7 | -5.7    | 27.6 | 1        | 1   | 3    | 2   |
| Westbrook    | N  | USA (AR) | 2002     | 750  | 4791  | 73   | -6.3            | 23.5 | -7.3 | 23.2 | -6.8    | 23.4 | 1        | 1   | 1    | 1   |

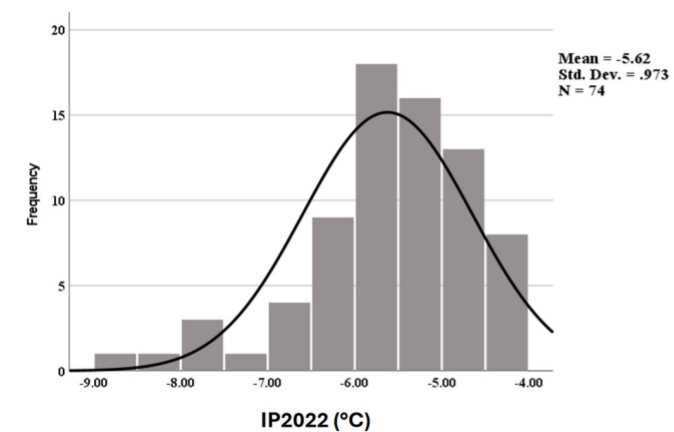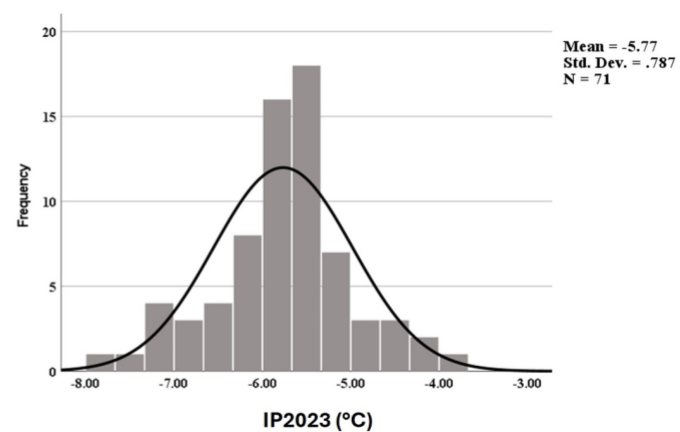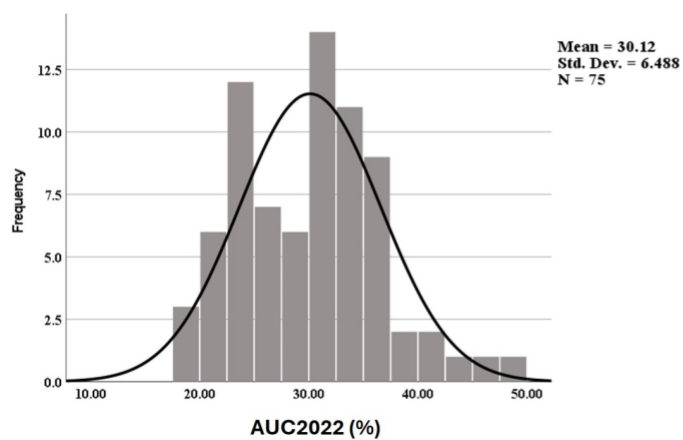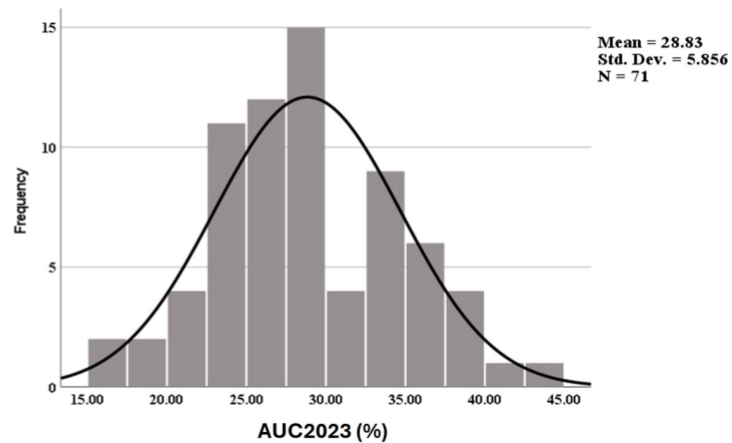

**Figure S1.** Frequency distribution of Inflection Point (IP) and area under the curve (AUC) of fruitlet freeze tolerance within the peach and nectarine germplasm in 2022 and 2023 season.

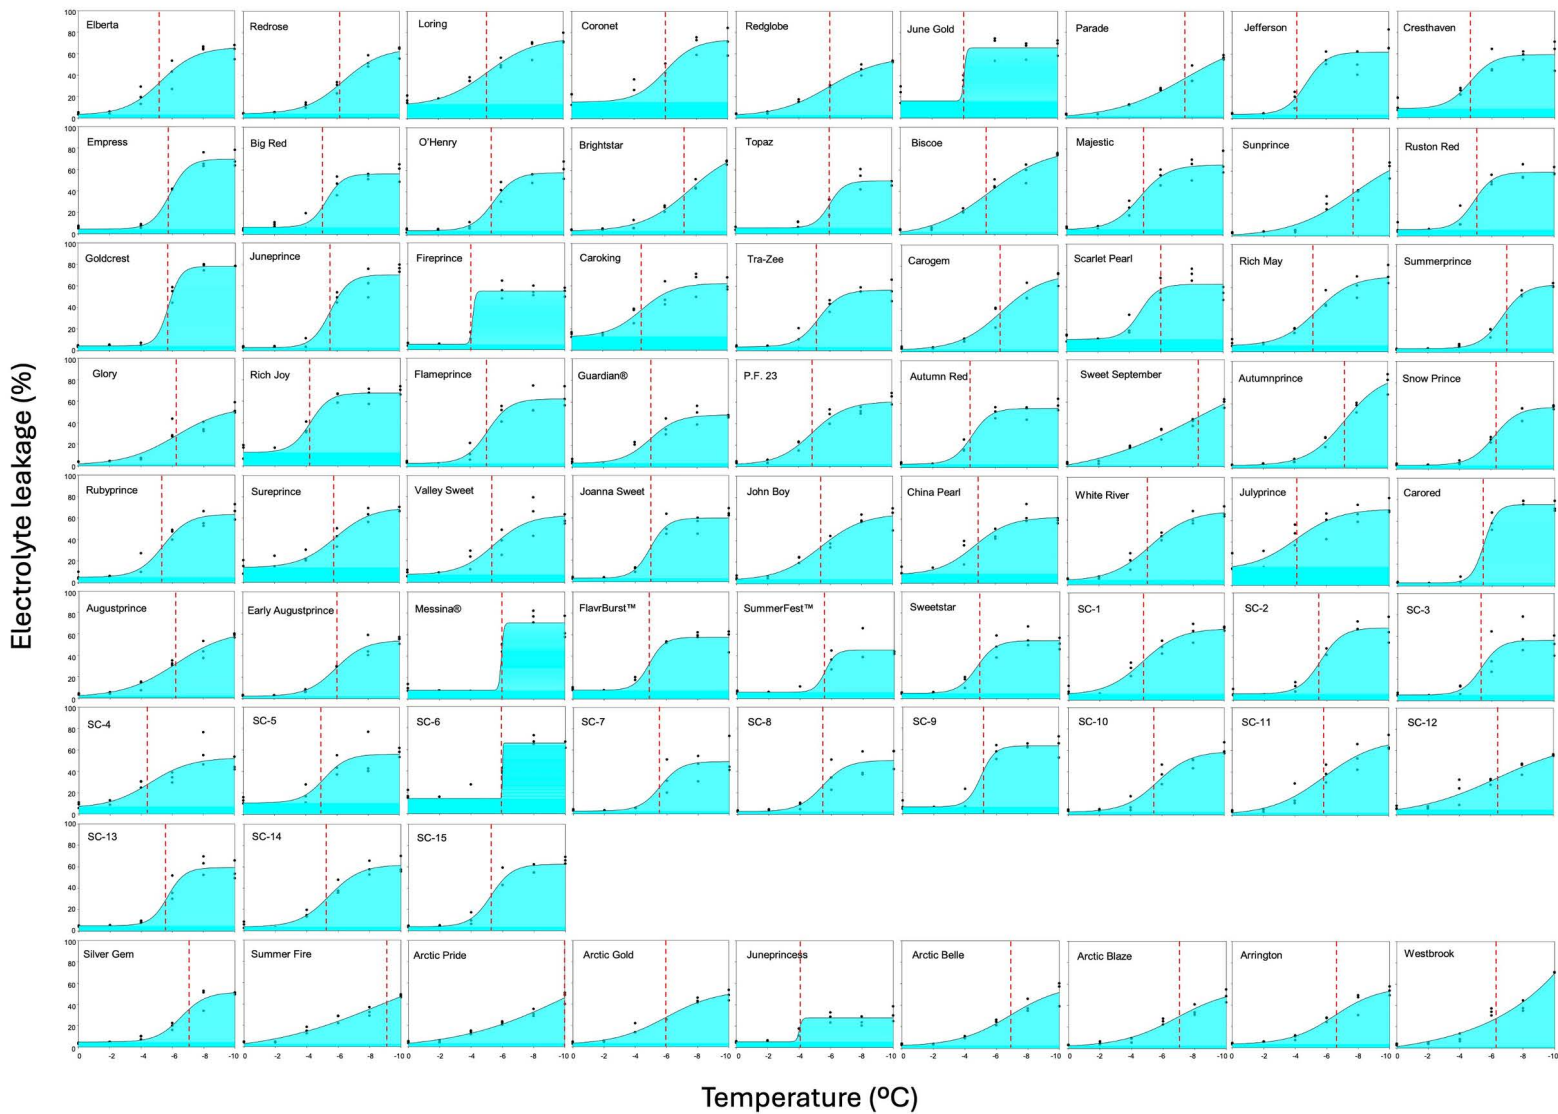

**Figure S2.** Fruitlet response to freezing temperatures observed in peach and nectarine germplasm in 2022. Accessions are separated in two groups peach and nectarines (last nine) and listed by release year from left to right; red line designates inflection point, the temperature at which 50% of fruitlets experience damage; blue area – area under the sigmoid curve represents % damage.

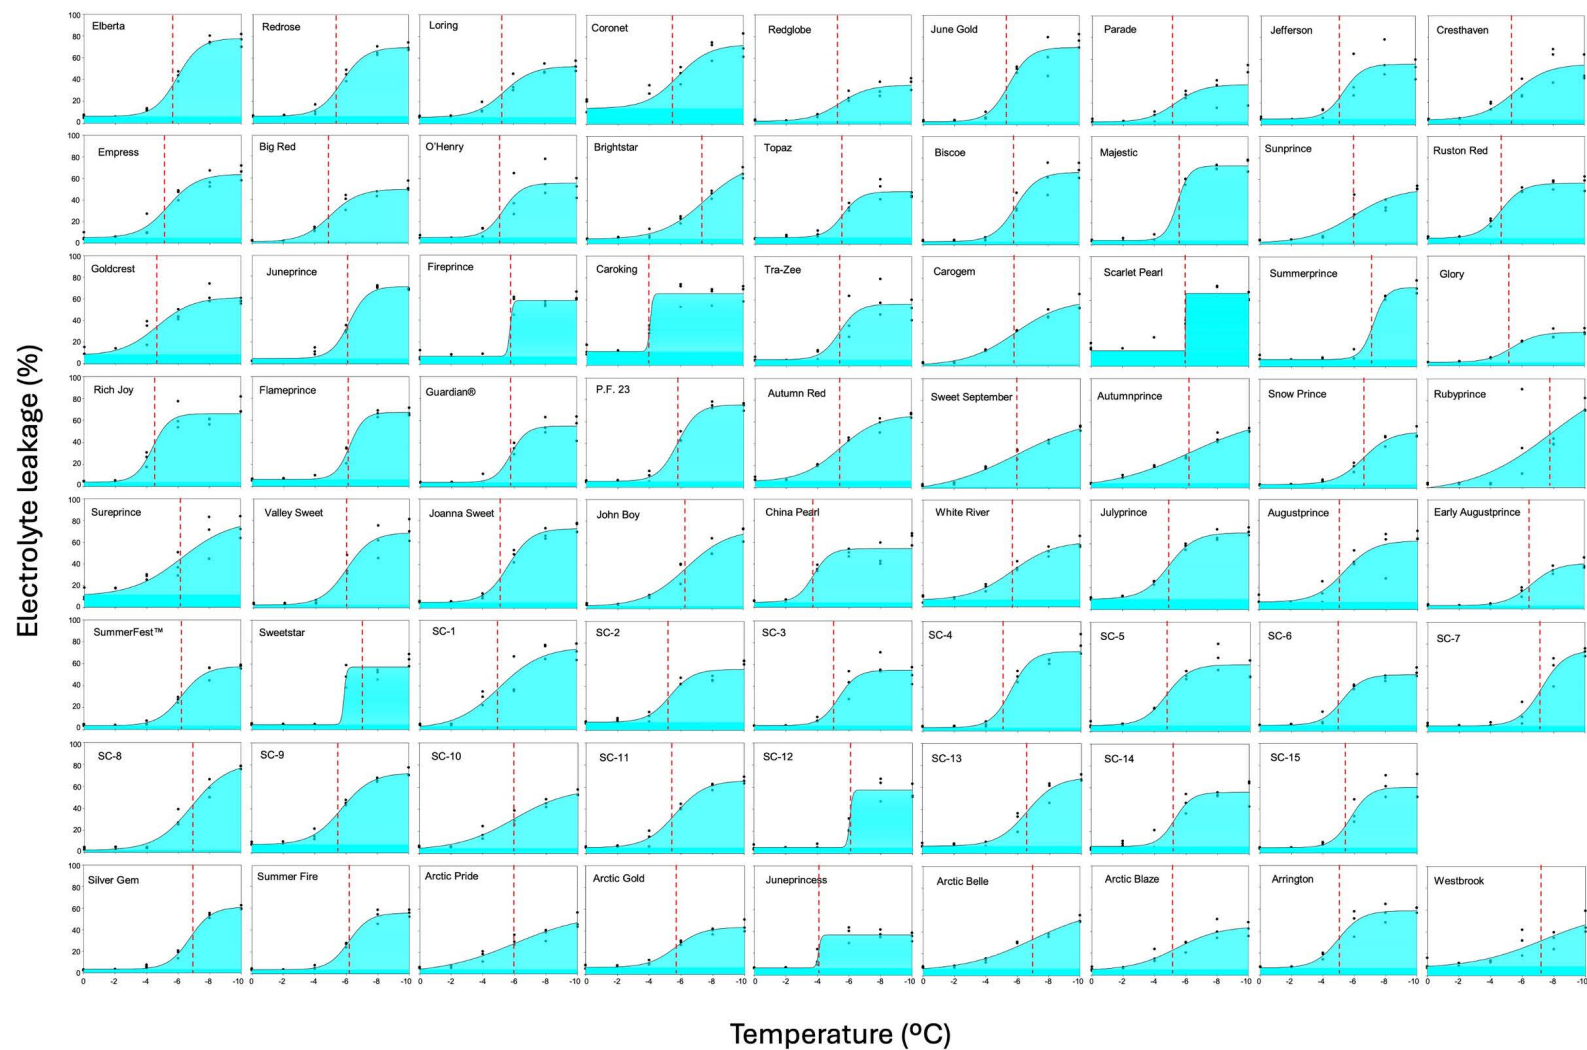

**Figure S3.** Fruitlet response to freezing temperatures observed in peach and nectarine germplasm in 2022. Accessions are separated in two groups peach and nectarines (last nine) and listed by release year from left to right; red line designates inflection point, the temperature at which 50% of fruitlets experience damage; blue area – area under the sigmoid curve represents % damage.
